# Supplementary material for: Combined Effects of Amino Acids in Garlic and Buna-Shimeji (Hypsizygus marmoreus) on Suppression of CCl4-Induced Hepatic Injury in Rats
Source: MDPI journal article supplement (doi:10.3390/foods10071491), 2021-06-27
Supplement: s1 [file s1]

Table S1 Contents of amino acids in garlic and bunashimeji extracts.

| Amino Acids (mg/100 g)      | Ge            | Gbe           | HGe           | HGBe          |
|-----------------------------|---------------|---------------|---------------|---------------|
| Asparaginic Acid            | 18.1          | 30.4          | N. D.         | N. D.         |
| Threonine                   | 30.9          | 125.3         | 28.9          | 97.1          |
| Serine                      | 32.5          | 148.1         | 32.7          | 153.9         |
| Asparagine                  | 241.0         | 149.1         | 214.2         | 156.5         |
| Glutamic Acid               | 143.8         | 422.5         | 150.4         | 409.0         |
| Glutamine                   | 15.0          | 122.5         | 19.2          | 119.6         |
| Glycine                     | 15.3          | 106.6         | 20.6          | 121.0         |
| Alanine                     | 284.0         | 569.8         | 198.5         | 491.7         |
| Valine                      | N. D.         | N. D.         | N. D.         | N. D.         |
| Cystine                     | N. D.         | N. D.         | N. D.         | N. D.         |
| Methionine                  | N. D.         | N. D.         | 6.3           | 40.2          |
| Isoleucine                  | 12.6          | 89.0          | 8.0           | 86.1          |
| Leucine                     | 18.0          | 170.1         | 20.3          | 187.2         |
| Tyrosine                    | 3.0           | 73.8          | 4.3           | 77.4          |
| Phenylalanine               | 31.7          | 86.7          | 30.3          | 125.3         |
| Histidine                   | N. D.         | 5.7           | 10.6          | 15.0          |
| Lysine                      | 213.7         | 263.3         | 267.2         | 375.7         |
| Tryptophan                  | N. D.         | N. D.         | N. D.         | N. D.         |
| Arginine                    | <b>3189.2</b> | <b>44.2</b>   | <b>3163.6</b> | <b>7.4</b>    |
| Proline                     | 80.1          | 153.2         | 79.3          | 167.3         |
|                             |               |               |               |               |
| Phosphoserine               | 56.6          | 87.6          | 11.4          | 27.3          |
| Taurine                     | N. D.         | N. D.         | N. D.         | N. D.         |
| Phosphoethanolamine         | N. D.         | N. D.         | N. D.         | N. D.         |
| Urea                        | N. D.         | 730.9         | N. D.         | 54.5          |
| Sarcosine                   | N. D.         | N. D.         | N. D.         | N. D.         |
| $\alpha$ -Aminoadipic Acid  | N. D.         | N. D.         | N. D.         | N. D.         |
| Citrulline                  | 32.6          | 39.8          | 29.4          | 50.2          |
| $\alpha$ -Aminobutyric Acid | N. D.         | 2.3           | N. D.         | 37.6          |
| Cystathionine               | 2.8           | 49.3          | 86.6          | 109.8         |
| $\beta$ -Alanine            | N. D.         | 40.8          | N. D.         | 75.7          |
| $\beta$ -Aminobutyric Acid  | N. D.         | N. D.         | N. D.         | N. D.         |
| $\gamma$ -Aminobutyric Acid | 78.4          | 76.1          | 82.0          | 147.5         |
| Monoethanolamine            | N. D.         | N. D.         | N. D.         | N. D.         |
| Ammonia                     | 802.1         | 49.5          | 123.1         | 56.6          |
| Hydroxylysine               | N. D.         | N. D.         | N. D.         | N. D.         |
| Ornithine                   | <b>22.9</b>   | <b>1693.2</b> | <b>25.8</b>   | <b>1972.4</b> |
| 1-Methylhistidine           | 9.0           | N. D.         | 5.6           | N. D.         |
| 3-Methylhistidine           | N. D.         | N. D.         | N. D.         | N. D.         |
| Anserine                    | N. D.         | N. D.         | N. D.         | N. D.         |
| Carnosine                   | N. D.         | N. D.         | N. D.         | N. D.         |
| Hydroxyproline              | N. D.         | N. D.         | N. D.         | N. D.         |
|                             |               |               |               |               |
| N.D. not determined         |               |               |               |               |
